# Supplementary material
Source: PubMed Central journal article supplement (PMC4714213)
Supplement: 10.1074_M115.662171_jbc.M115.662171-1.pdf [file 10.1074_M115.662171_jbc.M115.662171-1.pdf]

**Supplemental Table 1: Uninfected (Jurkat) Exosome Proteins**

| Reference                                                          | P (pro)  | Score  | MW       | Accession |
|--------------------------------------------------------------------|----------|--------|----------|-----------|
| Scan(s)                                                            | P (pep)  | XC     | Sp       | RSp       |
| glyceraldehyde-3-phosphate dehydrogenase                           | 1.00E-30 | 160.29 | 36030.4  | 7669492   |
| tubulin, beta 2                                                    | 1.00E-30 | 110.43 | 49875.0  | 4507729   |
| actin, gamma 1 propeptide                                          | 1.00E-30 | 70.30  | 41765.8  | 4501887   |
| tyrosine 3/tryptophan 5 -monooxygenase activation protein, epsilon | 1.00E-30 | 20.25  | 29155.4  | 5803225   |
| tyrosine 3/tryptophan 5-monooxygenase activation protein, beta     | 2.22E-15 | 10.24  | 28064.8  | 21328448  |
| fructose-bisphosphate aldolase C                                   | 6.66E-15 | 10.26  | 39431.3  | 4885063   |
| pyruvate kinase, muscle isoform M1                                 | 7.77E-15 | 70.29  | 58025.1  | 33286420  |
| T-complex protein 1 isoform a                                      | 7.77E-15 | 60.32  | 60305.7  | 57863257  |
| pyruvate kinase, muscle isoform M2                                 | 7.77E-15 | 30.24  | 57900.2  | 33286418  |
| tyrosine 3/tryptophan 5-monooxygenase activation protein, gamma    | 1.22E-14 | 10.21  | 28284.9  | 21464101  |
| histone cluster 2, H2aa3                                           | 2.00E-14 | 10.18  | 14086.9  | 4504251   |
| tyrosine 3/tryptophan 5 -monooxygenase activation protein, zeta    | 2.22E-14 | 10.21  | 27727.7  | 4507953   |
| ribosomal protein SA                                               | 2.78E-14 | 30.30  | 32833.4  | 59859885  |
| heat shock 90kDa protein 1, beta                                   | 3.44E-14 | 160.27 | 83212.2  | 20149594  |
| enolase 2                                                          | 3.21E-13 | 50.23  | 47239.1  | 5803011   |
| phosphoglycerate kinase 2                                          | 4.27E-13 | 30.25  | 44767.4  | 31543397  |
| H2A histone family, member V isoform 2                             | 4.84E-13 | 10.36  | 12138.7  | 20357599  |
| enolase 1                                                          | 6.57E-13 | 90.32  | 47139.4  | 4503571   |
| chaperonin containing TCP1, subunit 6A isoform a                   | 6.89E-13 | 50.26  | 57987.7  | 4502643   |
| coagulation factor II preproprotein                                | 7.17E-13 | 60.26  | 69992.2  | 4503635   |
| eukaryotic translation elongation factor 2                         | 7.43E-13 | 130.28 | 95277.1  | 4503483   |
| thrombospondin 1 precursor                                         | 8.12E-13 | 120.30 | 129299.2 | 40317626  |
| phosphoglycerate kinase 1                                          | 8.90E-13 | 140.29 | 44586.2  | 4505763   |
| vitronectin precursor                                              | 9.41E-13 | 30.28  | 54271.2  | 88853069  |
| ubiquitin-activating enzyme E1                                     | 1.10E-12 | 110.27 | 117774.5 | 23510340  |
| coronin, actin binding protein, 1A                                 | 1.16E-12 | 30.22  | 50993.9  | 5902134   |
| FK506 binding protein 52                                           | 2.07E-12 | 10.22  | 51772.2  | 4503729   |
| tubulin, alpha 3e                                                  | 2.24E-12 | 90.27  | 49884.6  | 46409270  |
| coagulation factor V precursor                                     | 3.22E-12 | 60.23  | 251543.8 | 105990535 |
| eukaryotic translation elongation factor 1 alpha 1                 | 5.46E-12 | 10.27  | 50109.2  | 4503471   |
| WD repeat-containing protein 1 isoform 1                           | 5.68E-12 | 20.22  | 66151.9  | 9257257   |
| fructose-bisphosphate aldolase A                                   | 5.91E-12 | 40.28  | 39395.3  | 193794814 |
| heat shock 90kDa protein 1, alpha isoform 1                        | 6.46E-12 | 50.25  | 98099.4  | 153792590 |
| ARP1 actin-related protein 1 homolog A, contractin alpha           | 1.33E-11 | 20.28  | 42586.9  | 5031569   |
| myosin, heavy polypeptide 9, non-muscle                            | 2.14E-11 | 120.25 | 226390.6 | 12667788  |
| inter-alpha globulin inhibitor H2 polypeptide                      | 2.15E-11 | 40.25  | 106396.8 | 70778918  |
| histone cluster 1, H2ad                                            | 2.82E-11 | 50.25  | 14098.9  | 10800130  |
| chaperonin containing TCP1, subunit 2                              | 2.86E-11 | 90.28  | 57452.3  | 5453603   |
| heat shock 70kDa protein 8 isoform 1                               | 3.27E-11 | 120.22 | 70854.4  | 5729877   |
| ribosomal protein S8                                               | 3.64E-11 | 50.25  | 24190.2  | 4506743   |
| alpha 2 globin                                                     | 3.71E-11 | 40.20  | 15247.9  | 4504345   |
| ribosomal protein L5                                               | 4.27E-11 | 10.25  | 34340.7  | 14591909  |
| aconitase 1                                                        | 4.51E-11 | 20.31  | 98336.7  | 8659555   |

|                                                                          |          |        |          |           |
|--------------------------------------------------------------------------|----------|--------|----------|-----------|
| chaperonin containing TCP1, subunit 5 (epsilon)                          | 5.09E-11 | 40.29  | 59632.9  | 24307939  |
| small nuclear ribonucleoprotein D1 polypeptide 16kDa                     | 5.70E-11 | 20.21  | 13273.4  | 5902102   |
| PREDICTED: similar to pyruvate kinase, muscle                            | 5.88E-11 | 120.27 | 39567.3  | 169218111 |
| mitochondrial ATP synthase beta subunit precursor                        | 6.45E-11 | 30.20  | 56524.7  | 32189394  |
| ras-related nuclear protein                                              | 8.36E-11 | 40.24  | 24407.6  | 5453555   |
| albumin preproprotein                                                    | 1.09E-10 | 50.20  | 69321.6  | 4502027   |
| septin 2                                                                 | 2.01E-10 | 20.17  | 41461.3  | 4758158   |
| tubulin alpha 6                                                          | 2.42E-10 | 90.26  | 49863.5  | 14389309  |
| tubulin, alpha 4a                                                        | 2.54E-10 | 20.21  | 49892.4  | 17921989  |
| glutathione transferase                                                  | 2.62E-10 | 30.24  | 23341.0  | 4504183   |
| chaperonin containing TCP1, subunit 4 (delta)                            | 2.91E-10 | 70.24  | 57887.9  | 38455427  |
| guanine nucleotide binding protein, beta polypeptide 2-like 1            | 3.22E-10 | 60.19  | 35054.6  | 5174447   |
| peptidylprolyl isomerase A                                               | 3.73E-10 | 20.22  | 18000.9  | 10863927  |
| pyrophosphatase 1                                                        | 3.83E-10 | 10.26  | 32639.2  | 11056044  |
| bisphosphoglycerate mutase 4                                             | 4.43E-10 | 10.25  | 28758.8  | 71274132  |
| tubulin, beta                                                            | 7.38E-10 | 30.27  | 49639.0  | 29788785  |
| actin, gamma 2 propeptide                                                | 8.01E-10 | 120.27 | 41849.8  | 4501889   |
| moesin                                                                   | 8.59E-10 | 70.23  | 67777.9  | 4505257   |
| clathrin heavy chain 1                                                   | 1.01E-09 | 110.31 | 191491.7 | 4758012   |
| chaperonin containing TCP1, subunit 8 (theta)                            | 1.20E-09 | 50.23  | 59582.6  | 48762932  |
| ATP citrate lyase isoform 1                                              | 1.42E-09 | 60.21  | 120762.1 | 38569421  |
| splicing factor 3b, subunit 3                                            | 1.46E-09 | 10.26  | 135491.9 | 54112121  |
| chaperonin containing TCP1, subunit 3 isoform a                          | 1.62E-09 | 60.24  | 60495.4  | 63162572  |
| phosphogluconate dehydrogenase                                           | 2.29E-09 | 10.26  | 53106.0  | 40068518  |
| heterogeneous nuclear ribonucleoprotein A1-like                          | 2.71E-09 | 10.25  | 34204.3  | 58761496  |
| adenosine kinase isoform a                                               | 3.50E-09 | 10.20  | 38678.6  | 32484973  |
| eukaryotic translation initiation factor 3 subunit 6 interacting protein | 3.52E-09 | 20.25  | 66684.5  | 7705433   |
| 3-oxoacid CoA transferase 1 precursor                                    | 3.58E-09 | 10.19  | 56122.0  | 4557817   |
| mitochondrial malate dehydrogenase precursor                             | 3.88E-09 | 20.21  | 35480.7  | 21735621  |
| SUMO-1 activating enzyme subunit 2                                       | 4.20E-09 | 10.24  | 71179.3  | 4885649   |
| profilin 1                                                               | 4.41E-09 | 50.24  | 15044.6  | 4826898   |
| aldo-keto reductase family 7, member A2                                  | 4.90E-09 | 10.23  | 39563.7  | 41327764  |
| histone cluster 2, H2ab                                                  | 5.28E-09 | 10.13  | 13986.8  | 28195394  |
| glucose phosphate isomerase                                              | 6.93E-09 | 50.23  | 63107.3  | 18201905  |
| cofilin 1 (non-muscle)                                                   | 8.31E-09 | 10.27  | 18490.7  | 5031635   |
| heat shock 70kDa protein 2                                               | 8.52E-09 | 40.23  | 69978.0  | 13676857  |
| isocitrate dehydrogenase 2 (NADP+), mitochondrial precursor              | 1.35E-08 | 20.20  | 50876.9  | 28178832  |
| chaperonin containing TCP1, subunit 7 isoform a                          | 1.61E-08 | 50.19  | 59329.0  | 5453607   |
| eukaryotic translation initiation factor 3, subunit 10 theta             | 1.82E-08 | 10.19  | 166467.5 | 4503509   |
| HLA-B associated transcript 1                                            | 2.55E-08 | 10.20  | 48960.0  | 18375623  |
| eukaryotic translation elongation factor 1 gamma                         | 2.68E-08 | 30.20  | 50087.2  | 4503481   |
| cofilin 2                                                                | 4.25E-08 | 10.17  | 18724.9  | 33946278  |
| ribosomal protein L22 proprotein                                         | 4.29E-08 | 10.19  | 14777.8  | 4506613   |
| glyceraldehyde-3-phosphate dehydrogenase, spermatogenic                  | 4.49E-08 | 10.19  | 44472.8  | 7657116   |
| heat shock 70kDa protein 1A                                              | 5.09E-08 | 10.16  | 70009.2  | 194248072 |
| ATP-dependent DNA helicase II                                            | 5.27E-08 | 20.23  | 82652.4  | 10863945  |
| programmed cell death 6 interacting protein isoform 1                    | 5.30E-08 | 20.23  | 95963.3  | 22027538  |

|                                                                |          |       |          |           |
|----------------------------------------------------------------|----------|-------|----------|-----------|
| coagulation factor XIII A1 subunit precursor                   | 5.35E-08 | 10.19 | 83215.7  | 119395709 |
| ribosomal protein P0                                           | 5.45E-08 | 30.21 | 34251.8  | 16933546  |
| pregnancy-zone protein                                         | 5.53E-08 | 30.21 | 163759.1 | 162809334 |
| methylenetetrahydrofolate dehydrogenase 1                      | 6.35E-08 | 10.20 | 101467.6 | 222136639 |
| ribosomal protein S16                                          | 6.48E-08 | 10.13 | 16435.0  | 4506691   |
| beta tubulin 1, class VI                                       | 6.99E-08 | 10.30 | 50294.6  | 13562114  |
| heterogeneous nuclear ribonucleoprotein L isoform a            | 7.32E-08 | 10.17 | 64092.4  | 52632383  |
| ribosomal protein S5                                           | 8.14E-08 | 20.26 | 22862.1  | 13904870  |
| PREDICTED: similar to complement component C3, partial         | 8.43E-08 | 20.20 | 144718.0 | 169218213 |
| transaldolase 1                                                | 8.47E-08 | 20.20 | 37516.5  | 5803187   |
| ribosomal protein S23                                          | 1.05E-07 | 10.18 | 15797.7  | 4506701   |
| brain glycogen phosphorylase                                   | 1.09E-07 | 10.19 | 96634.7  | 21361370  |
| RAP1B, member of RAS oncogene family-like                      | 1.37E-07 | 10.18 | 20911.6  | 148227764 |
| proteasome 26S non-ATPase subunit 5                            | 1.38E-07 | 10.17 | 56160.5  | 4826952   |
| heterogeneous nuclear ribonucleoprotein K isoform a            | 1.39E-07 | 10.14 | 50996.4  | 14165437  |
| ADP-ribosylation factor 3                                      | 1.50E-07 | 10.20 | 20587.7  | 4502203   |
| ezrin                                                          | 1.50E-07 | 10.16 | 69369.8  | 21614499  |
| thrombospondin 3 precursor                                     | 1.56E-07 | 10.17 | 104134.5 | 6005902   |
| protein phosphatase 1, catalytic subunit, beta isoform 1       | 1.63E-07 | 20.19 | 37162.6  | 4506005   |
| transketolase isoform 1                                        | 1.67E-07 | 10.12 | 67834.9  | 4507521   |
| ATP-binding cassette, sub-family E, member 1                   | 1.74E-07 | 20.16 | 67271.1  | 108773782 |
| chloride intracellular channel 1                               | 1.75E-07 | 20.27 | 26905.8  | 14251209  |
| phosphoserine aminotransferase 1 isoform 2                     | 2.03E-07 | 10.20 | 35166.1  | 10863955  |
| ribosomal protein L7                                           | 2.11E-07 | 10.18 | 29207.2  | 15431301  |
| IMP cyclohydrolase                                             | 2.17E-07 | 20.21 | 64575.5  | 20127454  |
| histone cluster 1, H2bi                                        | 2.21E-07 | 20.24 | 13897.6  | 4504271   |
| alanyl-tRNA synthetase                                         | 2.27E-07 | 10.14 | 106743.3 | 109148542 |
| ribosomal protein S6                                           | 2.59E-07 | 10.23 | 28663.0  | 17158044  |
| X-prolyl aminopeptidase (aminopeptidase P) 1, soluble          | 2.78E-07 | 30.19 | 69873.3  | 21359929  |
| nascent polypeptide-associated complex alpha subunit isoform b | 2.91E-07 | 10.20 | 23369.7  | 163965364 |
| casein kinase 2, alpha prime polypeptide                       | 2.93E-07 | 10.15 | 41187.2  | 4503097   |
| myotrophin                                                     | 2.95E-07 | 10.16 | 12886.6  | 21956645  |
| L-lactate dehydrogenase B                                      | 2.99E-07 | 40.20 | 36615.2  | 4557032   |
| heterogeneous nuclear ribonucleoprotein U-like 1 isoform a     | 3.40E-07 | 10.24 | 95679.3  | 21536326  |
| PREDICTED: similar to peptidylprolyl isomerase A isoform 2     | 3.55E-07 | 10.34 | 18013.8  | 88953813  |
| proteasome activator subunit 2                                 | 4.72E-07 | 10.20 | 27384.3  | 30410792  |
| damage-specific DNA binding protein 1                          | 4.80E-07 | 10.20 | 126887.4 | 148529014 |
| host cell factor 1                                             | 5.03E-07 | 10.12 | 208601.0 | 98986457  |
| ribosomal protein L4                                           | 5.66E-07 | 20.25 | 47667.5  | 16579885  |
| major histocompatibility complex, class I, A precursor         | 6.43E-07 | 10.21 | 40815.2  | 24797067  |
| tubulin, beta 6                                                | 8.17E-07 | 60.24 | 49825.0  | 14210536  |
| DEAD box polypeptide 17 isoform 1                              | 8.83E-07 | 10.17 | 80222.1  | 38201710  |
| eukaryotic translation initiation factor 4A2                   | 9.07E-07 | 30.21 | 46372.8  | 83700235  |
| L-3-hydroxyacyl-Coenzyme A dehydrogenase precursor             | 9.40E-07 | 10.18 | 34271.9  | 94557308  |
| replication protein A1, 70kDa                                  | 1.38E-06 | 10.16 | 68095.4  | 4506583   |
| NMDA receptor regulated 1                                      | 1.49E-06 | 10.13 | 101207.7 | 17149828  |
| eukaryotic translation elongation factor 1 alpha 2             | 1.53E-06 | 30.19 | 50438.4  | 4503475   |

|                                                                      |          |       |          |           |
|----------------------------------------------------------------------|----------|-------|----------|-----------|
| heterogeneous nuclear ribonucleoprotein D isoform d                  | 1.67E-06 | 10.21 | 30653.1  | 51477708  |
| smooth muscle myosin heavy chain 11 isoform SM2A                     | 1.82E-06 | 10.22 | 223438.2 | 13124875  |
| histone cluster 1, H4a                                               | 2.06E-06 | 10.20 | 11360.4  | 4504301   |
| apolipoprotein A-I preproprotein                                     | 2.10E-06 | 10.16 | 30758.9  | 4557321   |
| adaptor-related protein complex 2, alpha 1 subunit isoform 2         | 2.24E-06 | 10.15 | 105294.9 | 19913416  |
| guanine monophosphate synthetase                                     | 2.24E-06 | 10.19 | 76667.1  | 4504035   |
| talin 1                                                              | 2.41E-06 | 20.23 | 269596.3 | 223029410 |
| phosphofructokinase, platelet                                        | 2.49E-06 | 10.16 | 85541.6  | 11321601  |
| PRP19/PSO4 pre-mRNA processing factor 19 homolog                     | 2.53E-06 | 30.18 | 55146.4  | 7657381   |
| myosin, heavy polypeptide 10, non-muscle                             | 2.95E-06 | 40.20 | 228856.9 | 41406064  |
| eukaryotic translation initiation factor 3, subunit 5 epsilon, 47kDa | 3.00E-06 | 10.20 | 37540.2  | 4503519   |
| heterogeneous nuclear ribonucleoprotein H2                           | 3.02E-06 | 10.23 | 49232.3  | 9624998   |
| heat shock 70kDa protein 4                                           | 3.36E-06 | 20.18 | 94271.1  | 38327039  |
| ATP-dependent DNA helicase II, 70 kDa subunit                        | 3.44E-06 | 20.16 | 69799.2  | 4503841   |
| tubulin, beta polypeptide 4, member Q                                | 3.60E-06 | 20.34 | 48456.4  | 55770868  |
| histone cluster 1, H1b                                               | 3.85E-06 | 10.13 | 22566.5  | 4885381   |
| RAB2A, member RAS oncogene family                                    | 3.98E-06 | 10.18 | 23530.8  | 4506365   |
| ATPase, H+ transporting, lysosomal V1 subunit A                      | 5.67E-06 | 10.19 | 68260.6  | 19913424  |
| malic enzyme 2, NAD(+)-dependent, mitochondrial                      | 6.48E-06 | 10.15 | 65402.0  | 4505145   |
| CD81 antigen                                                         | 7.16E-06 | 10.25 | 25792.1  | 4757944   |
| arginyl-tRNA synthetase                                              | 8.65E-06 | 20.15 | 75331.0  | 15149476  |
| annexin VI isoform 1                                                 | 1.06E-05 | 50.25 | 75825.7  | 71773329  |
| DEAH (Asp-Glu-Ala-His) box polypeptide 15                            | 1.10E-05 | 20.17 | 90875.3  | 68509926  |
| Ras-related protein Rab-11A                                          | 1.15E-05 | 10.13 | 24378.4  | 4758984   |
| filamin A, alpha isoform 1                                           | 1.19E-05 | 10.22 | 279841.1 | 116063573 |
| epsilon globin                                                       | 1.20E-05 | 10.15 | 16192.5  | 4885393   |
| platelet-activating factor acetylhydrolase, isoform Ib, alpha        | 1.25E-05 | 30.16 | 46608.2  | 4557741   |
| acyl-CoA thioesterase 7 isoform hBACHa                               | 1.53E-05 | 20.18 | 40429.5  | 75709208  |
| ribosomal protein L7a                                                | 2.19E-05 | 20.17 | 29977.0  | 4506661   |
| splicing factor 3B, 14 kDa subunit                                   | 2.28E-05 | 10.22 | 14575.6  | 7706326   |
| DEAH (Asp-Glu-Ala-His) box polypeptide 9                             | 2.38E-05 | 10.17 | 140868.9 | 100913206 |
| ribosomal protein S3                                                 | 2.49E-05 | 10.19 | 26671.4  | 15718687  |
| ras homolog gene family, member C precursor                          | 2.77E-05 | 10.22 | 21992.3  | 28395033  |
| APEX nuclease 1                                                      | 2.98E-05 | 20.17 | 35532.2  | 18375501  |
| phosphoribosyl pyrophosphate amidotransferase proprotein             | 3.19E-05 | 10.16 | 57362.5  | 29570798  |
| ribosomal protein L30                                                | 3.61E-05 | 10.16 | 12775.7  | 4506631   |
| lysophospholipase II                                                 | 4.13E-05 | 10.19 | 24720.7  | 9966764   |
| dyskerin isoform 2                                                   | 5.17E-05 | 10.15 | 56996.6  | 215599015 |
| karyopherin alpha 2                                                  | 5.35E-05 | 10.17 | 57826.1  | 4504897   |
| histone cluster 1, H1c                                               | 5.39E-05 | 10.13 | 21351.8  | 4885375   |
| diaphanous 1 isoform 1                                               | 5.59E-05 | 10.19 | 141257.5 | 119395758 |
| CNDP dipeptidase 2                                                   | 6.46E-05 | 10.15 | 52745.9  | 8922699   |
| radixin                                                              | 7.42E-05 | 10.15 | 68521.5  | 4506467   |
| fatty acid synthase                                                  | 7.75E-05 | 10.14 | 273251.6 | 41872631  |
| ubiquitin-conjugating enzyme E2M                                     | 7.82E-05 | 10.16 | 20886.7  | 4507791   |
| transportin 1 isoform 1                                              | 8.23E-05 | 10.12 | 102288.9 | 133925811 |
| N-ethylmaleimide-sensitive factor attachment protein, alpha          | 8.34E-05 | 10.15 | 33211.3  | 47933379  |

|                                                                            |          |       |          |           |
|----------------------------------------------------------------------------|----------|-------|----------|-----------|
| phenylalanyl-tRNA synthetase, beta subunit                                 | 8.57E-05 | 20.16 | 66073.7  | 124028525 |
| regulator of chromosome condensation 2                                     | 1.01E-04 | 30.19 | 56049.3  | 29789090  |
| betaine-homocysteine methyltransferase                                     | 1.03E-04 | 10.22 | 44969.9  | 157266337 |
| macrophage migration inhibitory factor                                     | 1.03E-04 | 10.17 | 12468.2  | 4505185   |
| immunoglobulin superfamily, member 8                                       | 1.03E-04 | 10.17 | 64993.6  | 16445029  |
| L-lactate dehydrogenase A isoform 1                                        | 1.10E-04 | 20.24 | 36665.4  | 5031857   |
| leucyl-tRNA synthetase                                                     | 1.12E-04 | 10.15 | 134379.5 | 108773810 |
| nucleosome assembly protein 1-like 4                                       | 1.13E-04 | 10.13 | 42797.0  | 5174613   |
| tubulin, beta, 2                                                           | 1.26E-04 | 40.20 | 49799.0  | 5174735   |
| tyrosine 3/tryptophan 5 -monooxygenase activation protein, theta           | 1.30E-04 | 10.19 | 27746.8  | 5803227   |
| F-actin capping protein alpha-1 subunit                                    | 1.37E-04 | 10.16 | 32902.3  | 5453597   |
| ribosomal protein S9                                                       | 1.57E-04 | 10.14 | 22577.6  | 14141193  |
| alpha-2-macroglobulin precursor                                            | 1.59E-04 | 20.18 | 163188.3 | 66932947  |
| nucleosome assembly protein 1-like 1                                       | 1.65E-04 | 10.21 | 45346.0  | 4758756   |
| RAB7, member RAS oncogene family                                           | 1.77E-04 | 10.16 | 23474.9  | 34147513  |
| F-actin capping protein beta subunit                                       | 1.81E-04 | 10.15 | 30609.4  | 4826659   |
| olfactory receptor, family 5, subfamily H, member 2                        | 1.91E-04 | 10.15 | 35949.7  | 53828688  |
| ankyrin repeat domain 32                                                   | 1.96E-04 | 10.14 | 120972.5 | 188219549 |
| ribosomal protein S26                                                      | 2.03E-04 | 10.13 | 13007.1  | 15011936  |
| splicing factor proline/glutamine rich                                     | 2.34E-04 | 10.16 | 76101.8  | 4826998   |
| phosphoglucomutase 1                                                       | 2.50E-04 | 10.15 | 61410.6  | 21361621  |
| bisphosphoglycerate mutase 1                                               | 2.51E-04 | 10.19 | 28785.9  | 4505753   |
| gelsolin isoform b                                                         | 2.63E-04 | 10.15 | 80590.6  | 189083772 |
| triosephosphate isomerase 1 isoform 1                                      | 3.22E-04 | 10.13 | 26652.7  | 4507645   |
| ribosomal protein S27-like                                                 | 3.26E-04 | 10.18 | 9470.9   | 7705706   |
| activating signal cointegrator 1 complex subunit 3-like 1                  | 3.28E-04 | 10.15 | 244350.9 | 40217847  |
| pyridoxal phosphatase                                                      | 3.38E-04 | 10.17 | 31678.3  | 10092677  |
| GTPase Rab14                                                               | 3.54E-04 | 10.18 | 23881.9  | 19923483  |
| aspartyl-tRNA synthetase                                                   | 3.59E-04 | 10.13 | 57100.1  | 45439306  |
| transgelin 2                                                               | 4.15E-04 | 10.16 | 22377.2  | 4507357   |
| proliferating cell nuclear antigen                                         | 4.39E-04 | 10.18 | 28750.3  | 4505641   |
| vacuolar protein sorting 35                                                | 4.41E-04 | 10.13 | 91649.1  | 17999541  |
| family with sequence similarity 49, member A                               | 4.74E-04 | 10.13 | 37288.8  | 13540580  |
| ribosomal protein L27a                                                     | 4.74E-04 | 10.14 | 16551.0  | 4506625   |
| GNAS complex locus GNASL                                                   | 4.75E-04 | 10.15 | 45636.0  | 4504047   |
| esterase D/formylglutathione hydrolase                                     | 5.36E-04 | 10.22 | 31442.5  | 33413400  |
| annexin I                                                                  | 5.38E-04 | 10.14 | 38690.0  | 4502101   |
| actin related protein 2/3 complex subunit 4 isoform a                      | 5.60E-04 | 10.15 | 19654.3  | 5031595   |
| ribosomal protein L12                                                      | 7.59E-04 | 10.13 | 17807.5  | 4506597   |
| carboxypeptidase N, polypeptide 1 precursor                                | 8.45E-04 | 10.12 | 52253.4  | 4503011   |
| citrate synthase precursor                                                 | 8.71E-04 | 10.15 | 51679.6  | 38327625  |
| minichromosome maintenance complex component 3                             | 9.86E-04 | 10.13 | 90924.0  | 6631095   |
| neurolysin                                                                 | 1.00E+00 | 20.15 | 80599.8  | 14149738  |
| ribosomal protein S2                                                       | 1.00E+00 | 10.18 | 31304.6  | 15055539  |
| PREDICTED: similar to protein kinase, DNA-activated, catalytic polypeptide | 1.00E+00 | 10.17 | 465164.9 | 113430845 |
| SECIS binding protein 2                                                    | 1.00E+00 | 10.16 | 95402.4  | 83779010  |

**Supplemental Table 2: HIV-1 infected (J1.1) Exosome Proteins**

| Reference                                                          | P (pro)  | Score  | MW       | Accession |
|--------------------------------------------------------------------|----------|--------|----------|-----------|
| Scan(s)                                                            | P (pep)  | XC     | Sp       | RSp       |
| glyceraldehyde-3-phosphate dehydrogenase                           | 1.00E-30 | 120.29 | 36030.4  | 7669492   |
| pyruvate kinase, muscle isoform M2                                 | 1.00E-30 | 30.23  | 57900.2  | 33286418  |
| histone cluster 2, H3d                                             | 1.11E-15 | 10.27  | 15378.5  | 183076548 |
| myosin, heavy polypeptide 9, non-muscle                            | 3.33E-15 | 170.32 | 226390.6 | 12667788  |
| tyrosine 3/tryptophan 5 -monooxygenase activation protein, theta   | 9.99E-15 | 30.25  | 27746.8  | 5803227   |
| tubulin, beta 2                                                    | 1.22E-14 | 60.38  | 49875.0  | 4507729   |
| phosphoglycerate kinase 2                                          | 1.67E-14 | 20.27  | 44767.4  | 31543397  |
| pyruvate kinase, muscle isoform M1                                 | 1.78E-14 | 80.30  | 58025.1  | 33286420  |
| mitochondrial ATP synthase beta subunit precursor                  | 2.44E-14 | 70.23  | 56524.7  | 32189394  |
| phosphoglycerate kinase 1                                          | 2.89E-14 | 110.28 | 44586.2  | 4505763   |
| actin, gamma 1 propeptide                                          | 4.00E-14 | 110.30 | 41765.8  | 4501887   |
| enolase 2                                                          | 1.01E-13 | 50.23  | 47239.1  | 5803011   |
| enolase 1                                                          | 1.10E-13 | 80.27  | 47139.4  | 4503571   |
| PREDICTED: similar to pyruvate kinase, muscle                      | 2.44E-13 | 100.29 | 39567.3  | 169218111 |
| coronin, actin binding protein, 1A                                 | 3.29E-13 | 70.24  | 50993.9  | 5902134   |
| fructose-bisphosphate aldolase C                                   | 3.55E-13 | 10.27  | 39431.3  | 4885063   |
| histone cluster 2, H2aa3                                           | 3.63E-13 | 20.26  | 14086.9  | 4504251   |
| lymphocyte-specific protein tyrosine kinase precursor              | 5.33E-13 | 20.18  | 57964.0  | 112789546 |
| histone cluster 1, H2ad                                            | 2.37E-12 | 60.25  | 14098.9  | 10800130  |
| tubulin, alpha 3e                                                  | 2.75E-12 | 90.25  | 49884.6  | 46409270  |
| small nuclear ribonucleoprotein D1 polypeptide                     | 2.80E-12 | 10.20  | 13273.4  | 5902102   |
| histone cluster 1, H4a                                             | 4.15E-12 | 80.20  | 11360.4  | 4504301   |
| glutathione transferase                                            | 5.60E-12 | 40.28  | 23341.0  | 4504183   |
| profilin 1                                                         | 9.70E-12 | 60.22  | 15044.6  | 4826898   |
| tyrosine 3/tryptophan 5-monooxygenase activation protein, gamma    | 1.45E-11 | 10.23  | 28284.9  | 21464101  |
| mitochondrial malate dehydrogenase precursor                       | 1.70E-11 | 30.26  | 35480.7  | 21735621  |
| ubiquitin-activating enzyme E1                                     | 2.90E-11 | 30.20  | 117774.5 | 23510340  |
| tubulin, beta                                                      | 3.52E-11 | 50.29  | 49639.0  | 29788785  |
| albumin preproprotein                                              | 4.03E-11 | 40.24  | 69321.6  | 4502027   |
| actin, gamma 2 propeptide                                          | 4.42E-11 | 160.26 | 41849.8  | 4501889   |
| chaperonin                                                         | 4.59E-11 | 60.28  | 61016.5  | 31542947  |
| H2A histone family, member V isoform 2                             | 5.22E-11 | 10.31  | 12138.7  | 20357599  |
| clathrin heavy chain 1                                             | 5.74E-11 | 70.24  | 191491.7 | 4758012   |
| moesin                                                             | 1.47E-10 | 100.23 | 67777.9  | 4505257   |
| WD repeat-containing protein 1 isoform 1                           | 1.49E-10 | 30.21  | 66151.9  | 9257257   |
| bisphosphoglycerate mutase 4                                       | 1.81E-10 | 20.24  | 28758.8  | 71274132  |
| inter-alpha globulin inhibitor H2 polypeptide                      | 2.05E-10 | 20.17  | 106396.8 | 70778918  |
| glucose phosphate isomerase                                        | 2.31E-10 | 40.24  | 63107.3  | 18201905  |
| tubulin, beta 6                                                    | 3.11E-10 | 30.19  | 49825.0  | 14210536  |
| inosine monophosphate dehydrogenase 2                              | 3.35E-10 | 10.29  | 55769.7  | 66933016  |
| succinate dehydrogenase complex, subunit A, flavoprotein precursor | 4.01E-10 | 10.21  | 72645.4  | 156416003 |

|                                                                     |          |        |          |           |
|---------------------------------------------------------------------|----------|--------|----------|-----------|
| heat shock 10kDa protein 1                                          | 4.49E-10 | 20.22  | 10924.9  | 4504523   |
| peptidylprolyl isomerase A                                          | 6.23E-10 | 40.26  | 18000.9  | 10863927  |
| hydroxysteroid (17-beta) dehydrogenase 10 isoform 1                 | 7.44E-10 | 30.24  | 26906.1  | 4758504   |
| annexin VI isoform 1                                                | 1.05E-09 | 30.23  | 75825.7  | 71773329  |
| tubulin alpha 6                                                     | 1.22E-09 | 100.24 | 49863.5  | 14389309  |
| vitronectin precursor                                               | 1.25E-09 | 30.25  | 54271.2  | 88853069  |
| H3 histone family, member H                                         | 1.45E-09 | 10.24  | 15394.5  | 4504291   |
| talin 1                                                             | 1.71E-09 | 20.21  | 269596.3 | 223029410 |
| syntaxin binding protein 3                                          | 1.78E-09 | 10.15  | 67720.9  | 118600975 |
| tyrosine 3/tryptophan 5 -monooxygenase activation protein, zeta     | 2.04E-09 | 20.25  | 27727.7  | 4507953   |
| ribophorin II isoform 1 precursor                                   | 2.24E-09 | 10.21  | 69241.1  | 35493916  |
| chaperonin containing TCP1, subunit 6A isoform a                    | 2.88E-09 | 20.24  | 57987.7  | 4502643   |
| tubulin, alpha 4a                                                   | 4.16E-09 | 20.23  | 49892.4  | 17921989  |
| coactosin-like 1                                                    | 4.44E-09 | 30.22  | 15935.0  | 21624607  |
| eukaryotic translation elongation factor 2                          | 5.64E-09 | 50.25  | 95277.1  | 4503483   |
| pregnancy-zone protein                                              | 5.78E-09 | 20.16  | 163759.1 | 162809334 |
| tubulin, beta, 2                                                    | 6.51E-09 | 40.29  | 49799.0  | 5174735   |
| alpha 2 globin                                                      | 7.31E-09 | 40.26  | 15247.9  | 4504345   |
| chaperonin containing TCP1, subunit 4 (delta)                       | 7.62E-09 | 40.23  | 57887.9  | 38455427  |
| histone cluster 2, H2ab                                             | 9.26E-09 | 20.27  | 13986.8  | 28195394  |
| histone cluster 1, H2bi                                             | 9.64E-09 | 50.26  | 13897.6  | 4504271   |
| eukaryotic translation initiation factor 2B, subunit 1 alpha, 26kDa | 1.16E-08 | 10.19  | 33690.8  | 4503503   |
| sorbitol dehydrogenase                                              | 1.44E-08 | 10.19  | 38299.8  | 156627571 |
| CD81 antigen                                                        | 1.58E-08 | 10.24  | 25792.1  | 4757944   |
| solute carrier family 3, member 2 isoform a                         | 1.69E-08 | 20.20  | 71079.4  | 61744475  |
| heat shock 70kDa protein 5                                          | 1.75E-08 | 20.16  | 72288.5  | 16507237  |
| sideroflexin 1                                                      | 2.07E-08 | 10.23  | 35596.4  | 23618867  |
| chaperonin containing TCP1, subunit 5 (epsilon)                     | 2.12E-08 | 10.27  | 59632.9  | 24307939  |
| ATP synthase, H+ transporting, mitochondrial F1 complex precursor   | 2.88E-08 | 30.24  | 59713.7  | 4757810   |
| histone cluster 1, H2ae [Homo sapiens]                              | 2.93E-08 | 20.19  | 14127.0  | 10645195  |
| myosin, light chain 12A, regulatory, non-sarcomeric                 | 3.34E-08 | 20.24  | 19781.5  | 5453740   |
| ribosomal protein SA                                                | 3.46E-08 | 20.23  | 32833.4  | 59859885  |
| heat shock 70kDa protein 8 isoform 1                                | 3.93E-08 | 60.20  | 70854.4  | 5729877   |
| cofilin 2                                                           | 4.27E-08 | 10.17  | 18724.9  | 33946278  |
| heat shock 90kDa protein 1, beta                                    | 4.42E-08 | 80.19  | 83212.2  | 20149594  |
| filamin A, alpha isoform 1                                          | 4.58E-08 | 30.17  | 279841.1 | 116063573 |
| ATP-binding cassette, sub-family E, member 1                        | 5.32E-08 | 10.18  | 67271.1  | 108773782 |
| guanine nucleotide-binding protein, beta-2 subunit                  | 6.01E-08 | 20.16  | 37307.1  | 20357529  |
| myosin, light chain 6, alkali, smooth muscle, non-muscle isoform 1  | 6.02E-08 | 30.18  | 16919.1  | 17986258  |
| heat shock 70kDa protein 2                                          | 6.28E-08 | 20.18  | 69978.0  | 13676857  |
| Na+/K+ -ATPase alpha 1 subunit isoform b proprotein                 | 7.77E-08 | 20.24  | 74119.8  | 48762682  |
| guanine nucleotide binding protein, alpha inhibiting polypeptide 2  | 8.57E-08 | 30.27  | 40425.1  | 4504041   |
| keratin 10                                                          | 8.89E-08 | 30.18  | 58765.5  | 195972866 |
| heat shock 70kDa protein 9 precursor                                | 9.43E-08 | 10.13  | 73634.8  | 24234688  |
| annexin A2 isoform 2                                                | 9.65E-08 | 20.22  | 38579.8  | 209862831 |
| RAB8B, member RAS oncogene family                                   | 1.07E-07 | 10.17  | 23569.1  | 7706563   |
| asparaginyl-tRNA synthetase                                         | 1.08E-07 | 20.19  | 62902.6  | 4758762   |

|                                                               |          |       |          |           |
|---------------------------------------------------------------|----------|-------|----------|-----------|
| chloride intracellular channel 1                              | 1.49E-07 | 30.24 | 26905.8  | 14251209  |
| bisphosphoglycerate mutase 1                                  | 1.68E-07 | 10.22 | 28785.9  | 4505753   |
| keratin 2                                                     | 1.81E-07 | 10.22 | 65393.2  | 47132620  |
| splicing factor, arginine/serine-rich 10                      | 1.83E-07 | 10.18 | 33645.6  | 4759098   |
| protein disulfide-isomerase A3 precursor                      | 1.89E-07 | 20.22 | 56746.8  | 21361657  |
| PREDICTED: similar to hCG30646                                | 1.92E-07 | 10.19 | 30899.0  | 239744861 |
| eukaryotic translation elongation factor 1 gamma              | 1.95E-07 | 10.24 | 50087.2  | 4503481   |
| ribophorin I precursor                                        | 2.00E-07 | 30.18 | 68526.9  | 4506675   |
| cytosolic malate dehydrogenase                                | 2.17E-07 | 10.13 | 36403.0  | 5174539   |
| peroxisomal enoyl-coenzyme A hydratase-like protein           | 2.19E-07 | 20.24 | 35793.4  | 70995211  |
| histone cluster 1, H1c                                        | 2.26E-07 | 30.22 | 21351.8  | 4885375   |
| PKCI-1-related HIT protein                                    | 2.29E-07 | 10.17 | 17151.2  | 14211923  |
| ribosomal protein S16                                         | 3.00E-07 | 10.15 | 16435.0  | 4506691   |
| RAP1A, member of RAS oncogene family                          | 3.32E-07 | 10.16 | 20973.7  | 4506413   |
| Rho GDP dissociation inhibitor (GDI) beta                     | 3.44E-07 | 10.18 | 22973.6  | 56676393  |
| isocitrate dehydrogenase 2 (NADP+), mitochondrial precursor   | 3.46E-07 | 10.23 | 50876.9  | 28178832  |
| ras-related C3 botulinum toxin substrate 1 isoform Rac1       | 3.50E-07 | 10.16 | 21436.3  | 9845511   |
| eukaryotic translation initiation factor 4A2                  | 3.61E-07 | 10.20 | 46372.8  | 83700235  |
| myosin, heavy polypeptide 10, non-muscle                      | 3.96E-07 | 50.23 | 228856.9 | 41406064  |
| coagulation factor V precursor                                | 4.13E-07 | 30.23 | 251543.8 | 105990535 |
| chaperonin containing TCP1, subunit 7 isoform a               | 4.22E-07 | 40.19 | 59329.0  | 5453607   |
| ribosomal protein L14                                         | 4.27E-07 | 10.21 | 23417.0  | 78000181  |
| seryl-tRNA synthetase                                         | 4.51E-07 | 10.19 | 58740.1  | 16306548  |
| ribosomal protein S27-like                                    | 5.00E-07 | 10.24 | 9470.9   | 7705706   |
| protein phosphatase 1, catalytic subunit, beta isoform 1      | 5.10E-07 | 20.20 | 37162.6  | 4506005   |
| thioredoxin domain containing 4 (endoplasmic reticulum)       | 5.71E-07 | 10.15 | 46941.5  | 52487191  |
| ras-related C3 botulinum toxin substrate 2                    | 6.66E-07 | 10.13 | 21415.1  | 4506381   |
| chaperonin containing TCP1, subunit 3 isoform a               | 7.33E-07 | 30.17 | 60495.4  | 63162572  |
| triosephosphate isomerase 1 isoform 1                         | 7.66E-07 | 10.19 | 26652.7  | 4507645   |
| actin related protein 2/3 complex subunit 1B                  | 8.02E-07 | 10.20 | 40923.4  | 5031601   |
| ribosomal protein S3                                          | 8.13E-07 | 20.21 | 26671.4  | 15718687  |
| liver phosphofructokinase                                     | 8.28E-07 | 10.18 | 84964.3  | 48762920  |
| chaperonin containing TCP1, subunit 8 (theta)                 | 8.99E-07 | 40.20 | 59582.6  | 48762932  |
| radixin                                                       | 9.18E-07 | 30.23 | 68521.5  | 4506467   |
| ribosomal protein S8                                          | 1.15E-06 | 20.24 | 24190.2  | 4506743   |
| ERO1-like                                                     | 1.38E-06 | 10.23 | 54358.1  | 7657069   |
| guanine nucleotide binding protein, beta polypeptide 2-like 1 | 1.38E-06 | 40.19 | 35054.6  | 5174447   |
| H2A histone family, member Y2                                 | 1.45E-06 | 10.22 | 40033.4  | 8923920   |
| pyrophosphatase 1                                             | 1.52E-06 | 10.19 | 32639.2  | 11056044  |
| F-actin capping protein alpha-1 subunit                       | 1.61E-06 | 10.14 | 32902.3  | 5453597   |
| N-ethylmaleimide-sensitive factor attachment protein, alpha   | 1.65E-06 | 10.18 | 33211.3  | 47933379  |
| ATP-dependent DNA helicase II, 70 kDa subunit                 | 1.95E-06 | 10.14 | 69799.2  | 4503841   |
| alpha-2-macroglobulin precursor                               | 2.19E-06 | 20.18 | 163188.3 | 66932947  |
| heterogeneous nuclear ribonucleoprotein C isoform a           | 2.19E-06 | 10.22 | 33649.6  | 117189975 |
| heat shock 70kDa protein 1A                                   | 2.78E-06 | 10.23 | 70009.2  | 194248072 |
| heat shock 90kDa protein 1, alpha isoform 1                   | 2.88E-06 | 20.26 | 98099.4  | 153792590 |
| epsilon globin                                                | 2.91E-06 | 10.15 | 16192.5  | 4885393   |



|                                                                       |          |       |          |           |
|-----------------------------------------------------------------------|----------|-------|----------|-----------|
| ADP-ribosylation factor 3                                             | 3.20E-06 | 10.21 | 20587.7  | 4502203   |
| nucleosome assembly protein 1-like 1                                  | 4.37E-06 | 10.17 | 45346.0  | 4758756   |
| ribosomal protein L24                                                 | 4.47E-06 | 10.14 | 17767.9  | 4506619   |
| ribosomal protein S13                                                 | 5.34E-06 | 10.16 | 17211.7  | 4506685   |
| 3-oxoacid CoA transferase 1 precursor                                 | 5.44E-06 | 10.12 | 56122.0  | 4557817   |
| ribosomal protein S5                                                  | 5.94E-06 | 10.22 | 22862.1  | 13904870  |
| transmembrane protein 109                                             | 7.23E-06 | 10.18 | 26193.6  | 13129092  |
| smooth muscle myosin heavy chain 11 isoform SM2A                      | 7.49E-06 | 20.25 | 223438.2 | 13124875  |
| histone cluster 1, H1t                                                | 7.87E-06 | 10.17 | 22005.7  | 20544168  |
| phosphofructokinase, platelet                                         | 9.07E-06 | 30.20 | 85541.6  | 11321601  |
| ribosomal protein L11                                                 | 9.71E-06 | 10.21 | 20239.7  | 15431290  |
| galactokinase 1                                                       | 9.98E-06 | 20.19 | 42245.6  | 4503895   |
| PREDICTED: similar to protein kinase, DNA-activated polypeptide       | 1.01E-05 | 20.16 | 465164.9 | 113430845 |
| ribosomal protein L30                                                 | 1.09E-05 | 10.12 | 12775.7  | 4506631   |
| eukaryotic translation initiation factor 4A isoform 1                 | 1.16E-05 | 10.17 | 46124.6  | 4503529   |
| tripartite motif-containing 28 protein                                | 1.30E-05 | 10.19 | 88493.5  | 5032179   |
| platelet-activating factor acetylhydrolase, isoform Ib, alpha subunit | 1.37E-05 | 10.21 | 46608.2  | 4557741   |
| small nuclear ribonucleoprotein polypeptide D3                        | 1.41E-05 | 10.16 | 13907.3  | 4759160   |
| activating signal cointegrator 1 complex subunit 3-like 1             | 1.41E-05 | 10.13 | 244350.9 | 40217847  |
| keratin 1                                                             | 1.47E-05 | 10.18 | 65998.9  | 119395750 |
| histone cluster 1, H2bb                                               | 1.87E-05 | 20.21 | 13941.6  | 10800140  |
| Na <sup>+</sup> /K <sup>+</sup> -ATPase alpha 3 subunit               | 1.91E-05 | 10.15 | 111677.0 | 22748667  |
| ras homolog gene family, member A                                     | 1.93E-05 | 10.17 | 21754.1  | 10835049  |
| chaperonin containing TCP1, subunit 2                                 | 2.04E-05 | 20.19 | 57452.3  | 5453603   |
| eukaryotic translation elongation factor 1 alpha 2                    | 2.12E-05 | 20.18 | 50438.4  | 4503475   |
| N-myc downstream regulated 1                                          | 2.32E-05 | 10.16 | 42807.7  | 37655183  |
| isoleucine tRNA synthetase                                            | 2.49E-05 | 10.12 | 144405.8 | 94721241  |
| prohibitin 2 isoform 1                                                | 2.53E-05 | 10.16 | 33275.9  | 221307584 |
| poly(rC) binding protein 1                                            | 2.77E-05 | 20.18 | 37474.0  | 222352151 |
| bisphosphoglycerate mutase 2                                          | 2.85E-05 | 10.15 | 28747.9  | 50593010  |
| peroxiredoxin 1                                                       | 2.86E-05 | 10.16 | 22096.3  | 4505591   |
| macrophage migration inhibitory factor                                | 3.34E-05 | 10.15 | 12468.2  | 4505185   |
| histone cluster 1, H1a                                                | 3.35E-05 | 10.17 | 21828.9  | 4885373   |
| heterogeneous nuclear ribonucleoprotein K isoform a                   | 3.66E-05 | 30.20 | 50996.4  | 14165437  |
| L-lactate dehydrogenase A isoform 1                                   | 3.90E-05 | 30.26 | 36665.4  | 5031857   |
| ErbB3-binding protein 1                                               | 3.99E-05 | 10.20 | 43759.2  | 124494254 |
| ribosomal protein S23                                                 | 4.33E-05 | 10.16 | 15797.7  | 4506701   |
| coagulation factor II preproprotein                                   | 4.87E-05 | 10.14 | 69992.2  | 4503635   |
| ATP citrate lyase isoform 1                                           | 5.00E-05 | 30.18 | 120762.1 | 38569421  |
| myosin IG                                                             | 5.25E-05 | 10.14 | 116367.2 | 54873627  |
| non-POU domain containing, octamer-binding isoform 1                  | 5.68E-05 | 10.15 | 54197.4  | 34932414  |
| ribonuclease/angiogenin inhibitor                                     | 5.72E-05 | 10.15 | 49941.2  | 21361547  |
| sodium/hydrogen exchanger regulatory factor 1                         | 5.84E-05 | 10.13 | 38844.6  | 4759140   |
| cofilin 1 (non-muscle)                                                | 6.13E-05 | 10.16 | 18490.7  | 5031635   |
| Obg-like ATPase 1 isoform 1                                           | 6.18E-05 | 10.15 | 44715.4  | 58761500  |
| ras-related GTP-binding protein RAB10                                 | 6.58E-05 | 10.14 | 22454.6  | 33695095  |
| odz, odd Oz/ten-m homolog 3                                           | 7.46E-05 | 10.17 | 300757.7 | 122937400 |

|                                                                    |          |       |          |           |
|--------------------------------------------------------------------|----------|-------|----------|-----------|
| DEAH (Asp-Glu-Ala-His) box polypeptide 15                          | 7.78E-05 | 20.15 | 90875.3  | 68509926  |
| DEAD (Asp-Glu-Ala-Asp) box polypeptide 39                          | 7.97E-05 | 10.12 | 49098.1  | 21040371  |
| Tu translation elongation factor, mitochondrial precursor          | 8.04E-05 | 20.15 | 49843.4  | 34147630  |
| protein tyrosine phosphatase, receptor type, C isoform 2 precursor | 8.25E-05 | 10.12 | 130814.9 | 18641362  |
| delta globin                                                       | 8.41E-05 | 10.14 | 16045.3  | 4504351   |
| RAP1B, member of RAS oncogene family-like                          | 8.70E-05 | 10.15 | 20911.6  | 148227764 |
| adenosylhomocysteinase isoform 1                                   | 9.34E-05 | 10.15 | 47685.3  | 9951915   |
| poly (ADP-ribose) polymerase family, member 1                      | 9.44E-05 | 10.14 | 113012.4 | 156523968 |
| heterogeneous nuclear ribonucleoprotein D isoform d                | 9.58E-05 | 10.17 | 30653.1  | 51477708  |
| calreticulin precursor                                             | 1.00E-04 | 10.16 | 48111.9  | 4757900   |
| vesicle amine transport protein 1                                  | 1.02E-04 | 20.13 | 41893.5  | 18379349  |
| eukaryotic translation elongation factor 1 alpha 1                 | 1.16E-04 | 10.22 | 50109.2  | 4503471   |
| DEAH (Asp-Glu-Ala-His) box polypeptide 9                           | 1.34E-04 | 20.15 | 140868.9 | 100913206 |
| 3-hydroxyisobutyrate dehydrogenase                                 | 1.35E-04 | 10.17 | 35305.8  | 23308751  |
| fructose-bisphosphate aldolase A                                   | 1.36E-04 | 20.21 | 39395.3  | 193794814 |
| histone deacetylase 1                                              | 1.44E-04 | 10.18 | 55067.8  | 13128860  |
| tropomyosin 3 isoform 2                                            | 1.54E-04 | 10.18 | 29014.8  | 24119203  |
| ribosomal protein L10-like protein                                 | 1.63E-04 | 10.13 | 24502.7  | 18152783  |
| histidine triad nucleotide binding protein 1                       | 1.70E-04 | 10.16 | 13793.1  | 4885413   |
| casein kinase 2, beta polypeptide                                  | 1.77E-04 | 10.13 | 24926.0  | 23503295  |
| heterogeneous nuclear ribonucleoprotein U isoform a                | 2.30E-04 | 10.13 | 90528.0  | 74136883  |
| filamin B, beta (actin binding protein 278)                        | 2.55E-04 | 10.17 | 277987.3 | 105990514 |
| RAB7, member RAS oncogene family                                   | 3.08E-04 | 20.19 | 23474.9  | 34147513  |
| ankyrin repeat domain 32                                           | 3.16E-04 | 10.13 | 120972.5 | 188219549 |
| COP9 signalosome subunit 8 isoform 1                               | 3.20E-04 | 10.14 | 23211.0  | 5729779   |
| aldehyde dehydrogenase 9A1                                         | 3.67E-04 | 10.19 | 56255.5  | 115387104 |
| small ubiquitin-like modifier protein 3                            | 3.71E-04 | 10.16 | 11629.7  | 48928058  |
| olfactory receptor, family 5, subfamily H, member 2                | 3.78E-04 | 10.15 | 35949.7  | 53828688  |
| heterogeneous nuclear ribonucleoprotein R isoform 2                | 5.12E-04 | 20.12 | 70899.2  | 5031755   |
| tubulin, beta polypeptide 4, member Q                              | 5.24E-04 | 10.36 | 48456.4  | 55770868  |
| septin 9 isoform c                                                 | 5.46E-04 | 10.15 | 63626.0  | 116256489 |
| heterogeneous nuclear ribonucleoprotein C-like 1                   | 6.13E-04 | 10.15 | 32122.7  | 61966711  |
| CUG triplet repeat, RNA-binding protein 1 isoform 2                | 6.47E-04 | 10.13 | 51583.7  | 38570081  |
| guanine nucleotide-binding protein, beta-1 subunit                 | 8.12E-04 | 10.17 | 37353.0  | 11321585  |
| thiamine triphosphatase                                            | 8.25E-04 | 10.12 | 25550.0  | 13236577  |
| ras homolog gene family, member C precursor                        | 8.28E-04 | 10.15 | 21992.3  | 28395033  |
| stomatin (EPB72)-like 2                                            | 8.49E-04 | 10.15 | 38510.2  | 7305503   |
| histone cluster 1, H1b                                             | 8.70E-04 | 10.13 | 22566.5  | 4885381   |
| phosphoribosylaminoimidazole carboxylase, isoform 2                | 9.11E-04 | 10.14 | 47049.2  | 5453539   |
| leucine-rich repeat, immunoglobulin-like, transmembrane domains 3  | 9.87E-04 | 10.18 | 69876.3  | 193083136 |
| aconitase 2, mitochondrial precursor                               | 9.98E-04 | 10.14 | 85372.0  | 4501867   |
| neurolysin                                                         | 1.00E+00 | 10.15 | 80599.8  | 14149738  |
| SECIS binding protein 2                                            | 1.00E+00 | 10.12 | 95402.4  | 83779010  |

**Supplemental Table 3: HIV-1 infected (J1.1) Exosome Unique Proteins**

| Reference                                                                     | P (pro)  | Score | MW      | Accession |
|-------------------------------------------------------------------------------|----------|-------|---------|-----------|
| Scan(s)                                                                       | P (pep)  | XC    | Sp      | RSp       |
| histone cluster 2, H3d                                                        | 1.11E-15 | 10.27 | 15378.5 | 183076548 |
| lymphocyte-specific protein tyrosine kinase precursor                         | 5.33E-13 | 20.18 | 57964.0 | 112789546 |
| chaperonin                                                                    | 4.59E-11 | 60.28 | 61016.5 | 31542947  |
| inosine monophosphate dehydrogenase 2                                         | 3.35E-10 | 10.29 | 55769.7 | 66933016  |
| succinate dehydrogenase complex, subunit A, flavoprotein precursor            | 4.01E-10 | 10.21 | 72645.4 | 156416003 |
| heat shock 10kDa protein 1                                                    | 4.49E-10 | 20.22 | 10924.9 | 4504523   |
| hydroxysteroid (17-beta) dehydrogenase 10 isoform 1                           | 7.44E-10 | 30.24 | 26906.1 | 4758504   |
| H3 histone family, member H                                                   | 1.45E-09 | 10.24 | 15394.5 | 4504291   |
| syntaxin binding protein 3                                                    | 1.78E-09 | 10.15 | 67720.9 | 118600975 |
| ribophorin II isoform 1 precursor                                             | 2.24E-09 | 10.21 | 69241.1 | 35493916  |
| coactosin-like 1                                                              | 4.44E-09 | 30.22 | 15935.0 | 21624607  |
| eukaryotic translation initiation factor 2B, subunit 1 alpha, 26kDa           | 1.16E-08 | 10.19 | 33690.8 | 4503503   |
| sorbitol dehydrogenase                                                        | 1.44E-08 | 10.19 | 38299.8 | 156627571 |
| solute carrier family 3, member 2 isoform a                                   | 1.69E-08 | 20.20 | 71079.4 | 61744475  |
| heat shock 70kDa protein 5                                                    | 1.75E-08 | 20.16 | 72288.5 | 16507237  |
| sideroflexin 1                                                                | 2.07E-08 | 10.23 | 35596.4 | 23618867  |
| ATP synthase, H <sup>+</sup> transporting, mitochondrial F1 complex precursor | 2.88E-08 | 30.24 | 59713.7 | 4757810   |
| histone cluster 1, H2ae [Homo sapiens]                                        | 2.93E-08 | 20.19 | 14127.0 | 10645195  |
| myosin, light chain 12A, regulatory, non-sarcomeric                           | 3.34E-08 | 20.24 | 19781.5 | 5453740   |
| guanine nucleotide-binding protein, beta-2 subunit                            | 6.01E-08 | 20.16 | 37307.1 | 20357529  |
| myosin, light chain 6, alkali, smooth muscle, non-muscle isoform 1            | 6.02E-08 | 30.18 | 16919.1 | 17986258  |
| Na <sup>+</sup> /K <sup>+</sup> -ATPase alpha 1 subunit isoform b proprotein  | 7.77E-08 | 20.24 | 74119.8 | 48762682  |
| guanine nucleotide binding protein, alpha inhibiting polypeptide 2            | 8.57E-08 | 30.27 | 40425.1 | 4504041   |
| keratin 10                                                                    | 8.89E-08 | 30.18 | 58765.5 | 195972866 |
| heat shock 70kDa protein 9 precursor                                          | 9.43E-08 | 10.13 | 73634.8 | 24234688  |
| annexin A2 isoform 2                                                          | 9.65E-08 | 20.22 | 38579.8 | 209862831 |
| RAB8B, member RAS oncogene family                                             | 1.07E-07 | 10.17 | 23569.1 | 7706563   |
| asparaginyl-tRNA synthetase                                                   | 1.08E-07 | 20.19 | 62902.6 | 4758762   |
| keratin 2                                                                     | 1.81E-07 | 10.22 | 65393.2 | 47132620  |
| splicing factor, arginine/serine-rich 10                                      | 1.83E-07 | 10.18 | 33645.6 | 4759098   |
| protein disulfide-isomerase A3 precursor                                      | 1.89E-07 | 20.22 | 56746.8 | 21361657  |
| PREDICTED: similar to hCG30646                                                | 1.92E-07 | 10.19 | 30899.0 | 239744861 |
| ribophorin I precursor                                                        | 2.00E-07 | 30.18 | 68526.9 | 4506675   |
| cytosolic malate dehydrogenase                                                | 2.17E-07 | 10.13 | 36403.0 | 5174539   |
| peroxisomal enoyl-coenzyme A hydratase-like protein                           | 2.19E-07 | 20.24 | 35793.4 | 70995211  |
| PKCI-1-related HIT protein                                                    | 2.29E-07 | 10.17 | 17151.2 | 14211923  |
| RAP1A, member of RAS oncogene family                                          | 3.32E-07 | 10.16 | 20973.7 | 4506413   |
| Rho GDP dissociation inhibitor (GDI) beta                                     | 3.44E-07 | 10.18 | 22973.6 | 56676393  |
| ras-related C3 botulinum toxin substrate 1 isoform Rac1                       | 3.50E-07 | 10.16 | 21436.3 | 9845511   |
| ribosomal protein L14                                                         | 4.27E-07 | 10.21 | 23417.0 | 78000181  |
| seryl-tRNA synthetase                                                         | 4.51E-07 | 10.19 | 58740.1 | 16306548  |

|                                                                    |          |       |          |           |
|--------------------------------------------------------------------|----------|-------|----------|-----------|
| thioredoxin domain containing 4 (endoplasmic reticulum)            | 5.71E-07 | 10.15 | 46941.5  | 52487191  |
| ras-related C3 botulinum toxin substrate 2                         | 6.66E-07 | 10.13 | 21415.1  | 4506381   |
| actin related protein 2/3 complex subunit 1B                       | 8.02E-07 | 10.20 | 40923.4  | 5031601   |
| liver phosphofructokinase                                          | 8.28E-07 | 10.18 | 84964.3  | 48762920  |
| ERO1-like                                                          | 1.38E-06 | 10.23 | 54358.1  | 7657069   |
| H2A histone family, member Y2                                      | 1.45E-06 | 10.22 | 40033.4  | 8923920   |
| heterogeneous nuclear ribonucleoprotein C isoform a                | 2.19E-06 | 10.22 | 33649.6  | 117189975 |
| ribosomal protein L24                                              | 4.47E-06 | 10.14 | 17767.9  | 4506619   |
| ribosomal protein S13                                              | 5.34E-06 | 10.16 | 17211.7  | 4506685   |
| transmembrane protein 109                                          | 7.23E-06 | 10.18 | 26193.6  | 13129092  |
| histone cluster 1, H1t                                             | 7.87E-06 | 10.17 | 22005.7  | 20544168  |
| ribosomal protein L11                                              | 9.71E-06 | 10.21 | 20239.7  | 15431290  |
| galactokinase 1                                                    | 9.98E-06 | 20.19 | 42245.6  | 4503895   |
| eukaryotic translation initiation factor 4A isoform 1              | 1.16E-05 | 10.17 | 46124.6  | 4503529   |
| tripartite motif-containing 28 protein                             | 1.30E-05 | 10.19 | 88493.5  | 5032179   |
| small nuclear ribonucleoprotein polypeptide D3                     | 1.41E-05 | 10.16 | 13907.3  | 4759160   |
| keratin 1                                                          | 1.47E-05 | 10.18 | 65998.9  | 119395750 |
| histone cluster 1, H2bb                                            | 1.87E-05 | 20.21 | 13941.6  | 10800140  |
| Na <sup>+</sup> /K <sup>+</sup> -ATPase alpha 3 subunit            | 1.91E-05 | 10.15 | 111677.0 | 22748667  |
| ras homolog gene family, member A                                  | 1.93E-05 | 10.17 | 21754.1  | 10835049  |
| N-myc downstream regulated 1                                       | 2.32E-05 | 10.16 | 42807.7  | 37655183  |
| isoleucine tRNA synthetase                                         | 2.49E-05 | 10.12 | 144405.8 | 94721241  |
| prohibitin 2 isoform 1                                             | 2.53E-05 | 10.16 | 33275.9  | 221307584 |
| poly(rC) binding protein 1                                         | 2.77E-05 | 20.18 | 37474.0  | 222352151 |
| bisphosphoglycerate mutase 2                                       | 2.85E-05 | 10.15 | 28747.9  | 50593010  |
| peroxiredoxin 1                                                    | 2.86E-05 | 10.16 | 22096.3  | 4505591   |
| histone cluster 1, H1a                                             | 3.35E-05 | 10.17 | 21828.9  | 4885373   |
| ErbB3-binding protein 1                                            | 3.99E-05 | 10.20 | 43759.2  | 124494254 |
| myosin IG                                                          | 5.25E-05 | 10.14 | 116367.2 | 54873627  |
| non-POU domain containing, octamer-binding isoform 1               | 5.68E-05 | 10.15 | 54197.4  | 34932414  |
| ribonuclease/angiogenin inhibitor                                  | 5.72E-05 | 10.15 | 49941.2  | 21361547  |
| sodium/hydrogen exchanger regulatory factor 1                      | 5.84E-05 | 10.13 | 38844.6  | 4759140   |
| Obg-like ATPase 1 isoform 1                                        | 6.18E-05 | 10.15 | 44715.4  | 58761500  |
| ras-related GTP-binding protein RAB10                              | 6.58E-05 | 10.14 | 22454.6  | 33695095  |
| odz, odd Oz/ten-m homolog 3                                        | 7.46E-05 | 10.17 | 300757.7 | 122937400 |
| DEAD (Asp-Glu-Ala-Asp) box polypeptide 39                          | 7.97E-05 | 10.12 | 49098.1  | 21040371  |
| Tu translation elongation factor, mitochondrial precursor          | 8.04E-05 | 20.15 | 49843.4  | 34147630  |
| protein tyrosine phosphatase, receptor type, C isoform 2 precursor | 8.25E-05 | 10.12 | 130814.9 | 18641362  |
| delta globin                                                       | 8.41E-05 | 10.14 | 16045.3  | 4504351   |
| adenosylhomocysteinase isoform 1                                   | 9.34E-05 | 10.15 | 47685.3  | 9951915   |
| poly (ADP-ribose) polymerase family, member 1                      | 9.44E-05 | 10.14 | 113012.4 | 156523968 |
| calreticulin precursor                                             | 1.00E-04 | 10.16 | 48111.9  | 4757900   |
| vesicle amine transport protein 1                                  | 1.02E-04 | 20.13 | 41893.5  | 18379349  |
| 3-hydroxyisobutyrate dehydrogenase                                 | 1.35E-04 | 10.17 | 35305.8  | 23308751  |
| histone deacetylase 1                                              | 1.44E-04 | 10.18 | 55067.8  | 13128860  |
| tropomyosin 3 isoform 2                                            | 1.54E-04 | 10.18 | 29014.8  | 24119203  |
| ribosomal protein L10-like protein                                 | 1.63E-04 | 10.13 | 24502.7  | 18152783  |

|                                                                   |          |       |          |           |
|-------------------------------------------------------------------|----------|-------|----------|-----------|
| histidine triad nucleotide binding protein 1                      | 1.70E-04 | 10.16 | 13793.1  | 4885413   |
| casein kinase 2, beta polypeptide                                 | 1.77E-04 | 10.13 | 24926.0  | 23503295  |
| heterogeneous nuclear ribonucleoprotein U isoform a               | 2.30E-04 | 10.13 | 90528.0  | 74136883  |
| filamin B, beta (actin binding protein 278)                       | 2.55E-04 | 10.17 | 277987.3 | 105990514 |
| COP9 signalosome subunit 8 isoform 1                              | 3.20E-04 | 10.14 | 23211.0  | 5729779   |
| aldehyde dehydrogenase 9A1                                        | 3.67E-04 | 10.19 | 56255.5  | 115387104 |
| small ubiquitin-like modifier protein 3                           | 3.71E-04 | 10.16 | 11629.7  | 48928058  |
| heterogeneous nuclear ribonucleoprotein R isoform 2               | 5.12E-04 | 20.12 | 70899.2  | 5031755   |
| septin 9 isoform c                                                | 5.46E-04 | 10.15 | 63626.0  | 116256489 |
| heterogeneous nuclear ribonucleoprotein C-like 1                  | 6.13E-04 | 10.15 | 32122.7  | 61966711  |
| CUG triplet repeat, RNA-binding protein 1 isoform 2               | 6.47E-04 | 10.13 | 51583.7  | 38570081  |
| guanine nucleotide-binding protein, beta-1 subunit                | 8.12E-04 | 10.17 | 37353.0  | 11321585  |
| thiamine triphosphatase                                           | 8.25E-04 | 10.12 | 25550.0  | 13236577  |
| stomatin (EPB72)-like 2                                           | 8.49E-04 | 10.15 | 38510.2  | 7305503   |
| phosphoribosylaminoimidazole carboxylase, isoform 2               | 9.11E-04 | 10.14 | 47049.2  | 5453539   |
| leucine-rich repeat, immunoglobulin-like, transmembrane domains 3 | 9.87E-04 | 10.18 | 69876.3  | 193083136 |
| aconitase 2, mitochondrial precursor                              | 9.98E-04 | 10.14 | 85372.0  | 4501867   |

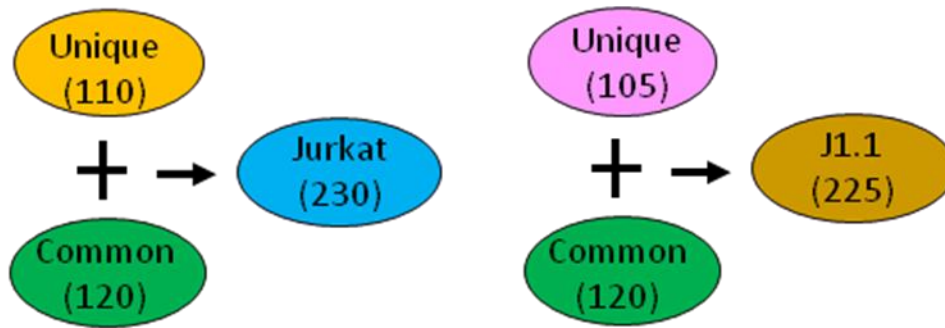

**Supplemental Figure 1.** Exosomes released by HIV-1 infected cells contain common and unique host proteins. Exosomes derived from uninfected Jurkat and HIV-1 infected J1.1 cell culture supernatants were analyzed by LC-MS/MS to determine the host proteomic profile. A total of 120 proteins were common to exosomes from both uninfected and infected cell types while 105 and 110 unique proteins were identified in exosomes from Jurkat and J1.1 cells, respectively.
